# Supplementary material for: Influence of ANKK1 and DRD2 polymorphisms in response to haloperidol
Source: Springer Nature journal article supplement (doi:10.1007/s00406-012-0348-1), 2012-08-14
Supplement: MOESM3 [file 406_2012_348_MOESM3_ESM.docx]

**Supplementary table 3.** Single Nucleotide Polymorphisms considered in this study.

* Absolute chromosomal position. HWE=Hardy-Weinberg Equilibrium. The relative position to the start codon is given in parenthesis. All data from http://snpper.chip.org/.

| **SNP ID** | **Position*** | **HWE’s *p* value** | **Alleles** | **Location** |
| --- | --- | --- | --- | --- |
| **ANKK1 gene** | | | | |
| ***rs877138*** | 113256508  (-2005) | 0.4895 | A/G | Promoter |
| ***rs17600713*** | 113259947  (1435) | 0.432 | A/G | Intron |
| ***rs4938015*** | 113264644  (6132) | 0.9999 | C/T | Intron |
| ***rs11604671*** | 113268059  (9547) | 0.2616 | A/G | Coding exon |
| ***rs2734849*** | 113270160  (11648) | 0.3793 | C/T | Coding exon |
| ***rs2587550*** | 113272925  (14413) | 0.4526 | C/T | Downstream |
| ***rs1003641*** | 113273636  (15124) | 0.1768 | A/G | Downstream |
| ***rs2242592*** | 113279430  (20918) | 0.6709 | C/T | Downstream |
| ***rs6279*** | 113281073  (22561) | 0.7085 | C/G | Downstream |
| **DRD2 GENE** | | | | |
| ***rs1124492*** | 113282275  (63727) | 0.293 | A/C | Intron |
| ***rs1124493*** | 113282295  (63707) | 0.2093 | T/G | Intron |
| ***rs1079595*** | 113282669  (63333) | 1.0 | T/G | Intron |
| ***rs1079594*** | 113282812  (63190) | 1.0 | T/G | Intron |
| ***rs6277*** | 113283459  (62543) | 0.1704 | C/T | Coding exon |
| ***rs6275*** | 113283477  (62525) | 0.5891 | C/T | Coding exon |
| ***rs1800499*** | 113287694  (58308) | 0.0397 | A/G | Coding exon |
| ***rs2075654*** | 113289066  (56936) | 0.9635 | A/G | Intron |
| ***rs2002453*** | 113289298  (56704) | 0.1046 | T/C | Intron |
| ***rs2245805*** | 113290699  (55303) | 0.1865 | A/C | Intron |
| ***rs2734836*** | 113291239  (54763) | 1.0 | G/A | Intron |
| ***rs1116313*** | 113296107  (49895) | 0.5221 | T/C | Intron |
| ***rs1125393*** | 113297349  (48653) | 0.3522 | C/T | Intron |
| ***rs7131440*** | 113299910  (46092) | 1.0 | C/T | Intron |
| ***rs12800853*** | 113302514  (43488) | 0.6946 | A/G | Intron |
| ***rs12364051*** | 113305314  (40688) | 0.6855 | A/G | Intron |
| ***rs4436578*** | 113306765  (39237) | 0.4713 | C/T | Intron |
| ***rs17115583*** | 113308902  (37100) | 0.2627 | A/G | Intron |
| ***rs4648318*** | 113313389  (832613) | 0.4491 | A/G | Intron |
| ***rs4274224*** | 113319452  (26550) | 0.5182 | A/G | Intron |
| ***rs7131056*** | 113329774  (16228) | 0.8423 | A/C | Intron |
| ***rs4648317*** | 113331532  (14470) | 0.6502 | T/C | Intron |
| ***rs7117915*** | 113333425  (12577) | 0.4711 | A/G | Intron |
| ***rs4938019*** | 113341391  (4611) | 0.5489 | C/T | Intron |
| ***rs1799978*** | 113346351  (-350) | 1.0 | A/G | Promoter |
| ***rs10891556*** | 113352761  (-6760) | 0.4798 | T/G | Promoter |
| ***rs658937*** | 113355736  (-9735) | 1.0 | A/G | Promoter |
