# Supplementary material for: Influence of ANKK1 and DRD2 polymorphisms in response to haloperidol
Source: Springer Nature journal article supplement (doi:10.1007/s00406-012-0348-1), 2012-08-14
Supplement: MOESM4 [file 8440694]

| **DRD2 haplotypes** | | | | |
| --- | --- | --- | --- | --- |
| rs1124492-rs1124493 rs1079595-rs1079594- rs6277-rs6275  c-g  t- g  c-c | 11.29  (0.0459) | 0.40483 | -2.50574 | 0.01222 |
| rs1124492-rs1124493 rs1079595-rs1079594  rs6277  c-g  t-g  c-c | 10.91  (0.0531) | 0.40483 | -2.50574 | 0.01222 |
| **rs1124493 rs1079595 rs1124492-rs1079594**  **c-g**  **t-g** | 8.448 (0.0764) | 0.40451 | -2.49254 | **0.00126** |

**Supplementary table 4.** Sliding windows analysis performed on the rs1124492-rs1124493-rs1079595-rs1079594-rs6277-rs6275 block among the DRD2 gene
